# Supplementary material
Source: publisher figshare collection journal article supplement (https://acs.figshare.com/ndownloader/files/5714547)

## Supplementary Material

*Variable-Temperature Emission Studies of Solvation Dynamics:  
Evidence for Coupling of Solvation to Chromophore Structural Dynamics  
in the Evolution of Charge-Transfer Excited States*

Niels H. Damrauer and James K. McCusker\*

### Figure Captions for Supplementary Material

- Figure S1.* Emission spectra for  $[\text{Ru}(\text{dmb})_3]^{2+}$  in 4:1 EtOH/MeOH as a function of temperature. *Top panel:* 90-140K ( $\Delta T=10\text{K}$ ). *Middle panel:* 140-210K ( $\Delta T=10\text{K}$ ). *Bottom panel:* 210-290K ( $\Delta T=10\text{K}$ ) plus a spectrum at 298K.
- Figure S2.* Emission spectra at 90K for  $[\text{Ru}(\text{dmb})_3]^{2+}$  in 4:1 EtOH/MeOH (solid) and 2-MeTHF (dashed).
- Figure S3.* Room temperature absorption spectra of  $[\text{Ru}(\text{dmesb})_3]^{2+}$  in 4:1 EtOH/MeOH (dashed) and 2-MeTHF (solid).

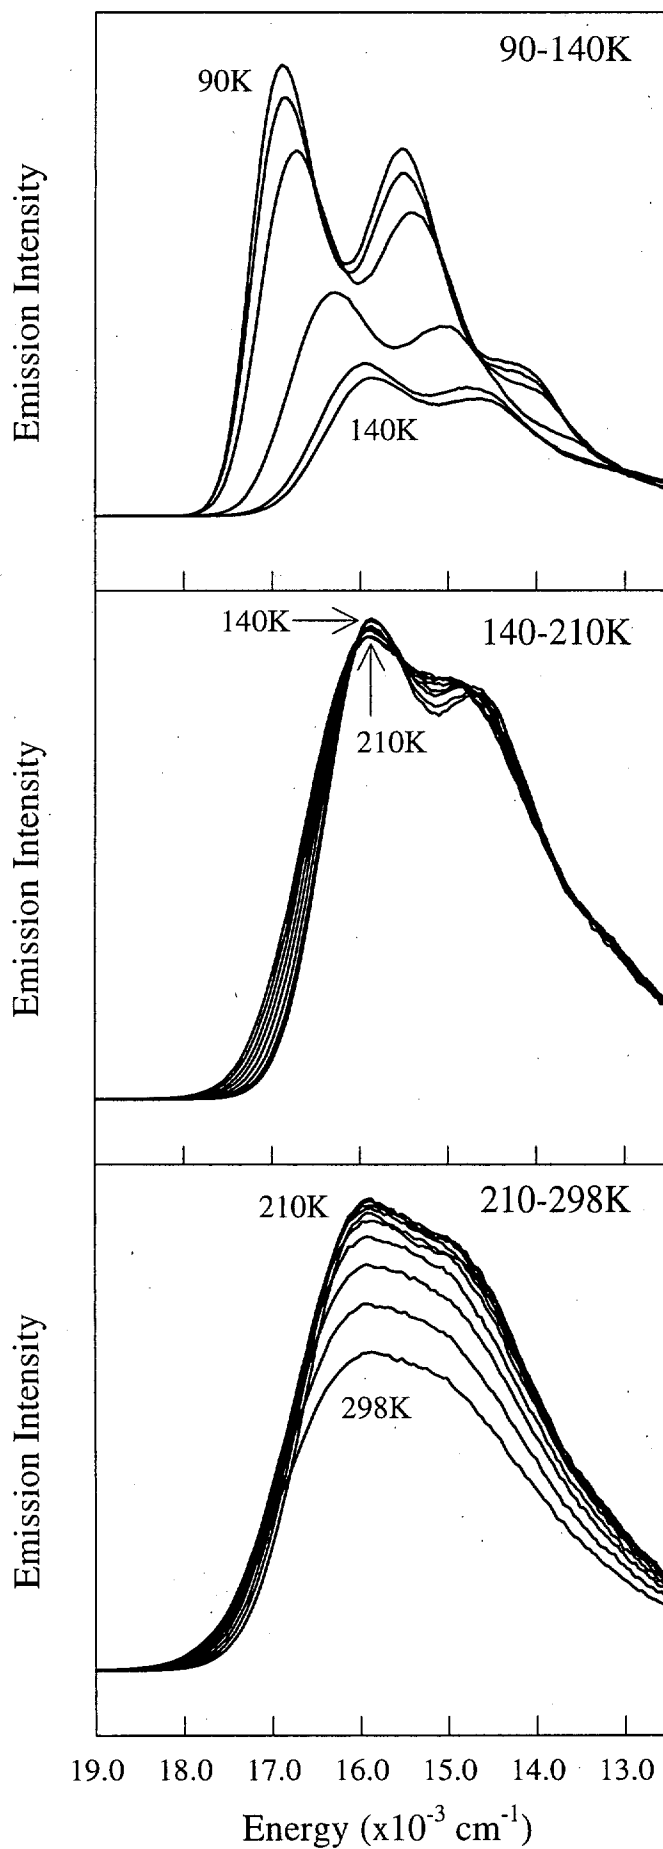

Figure S2

3

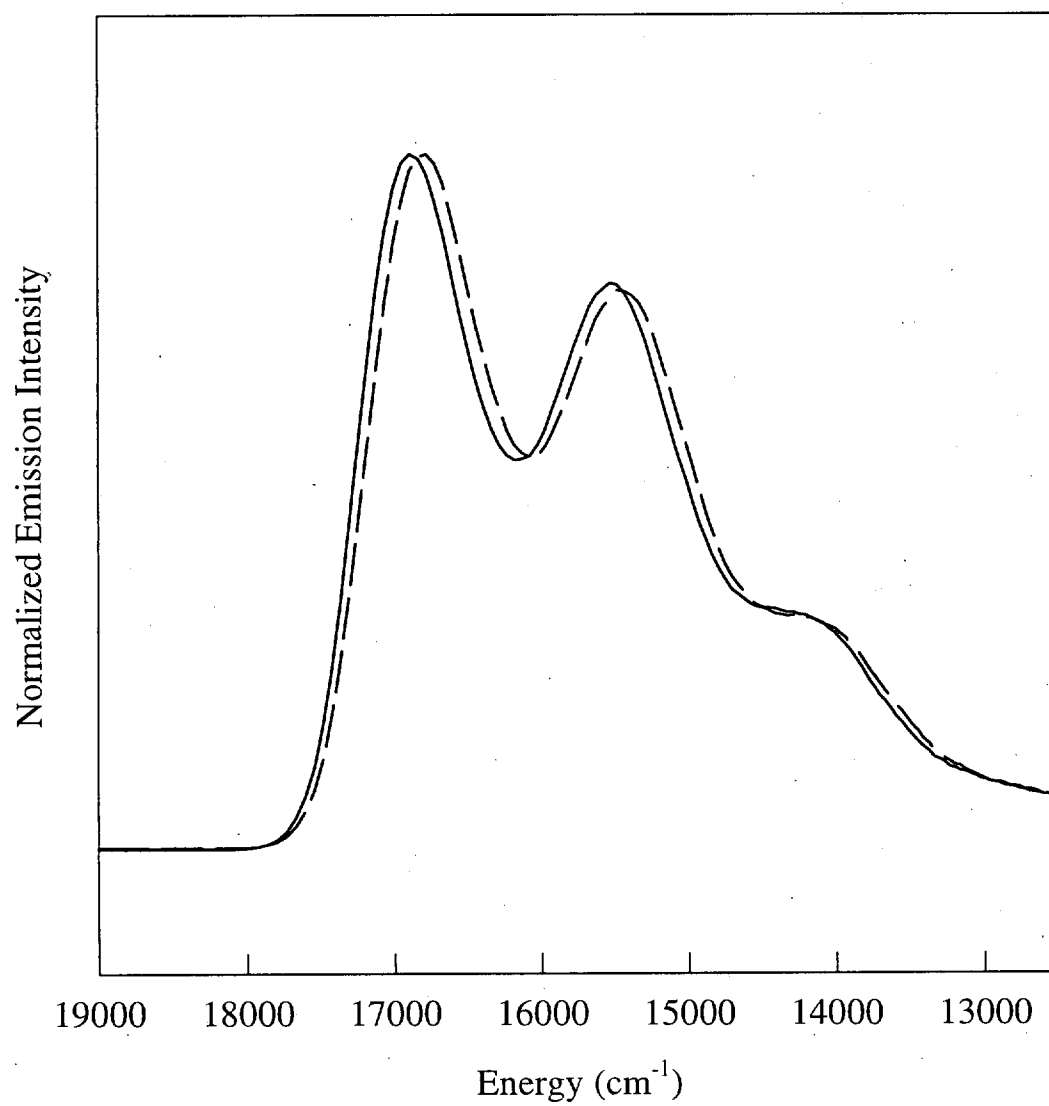

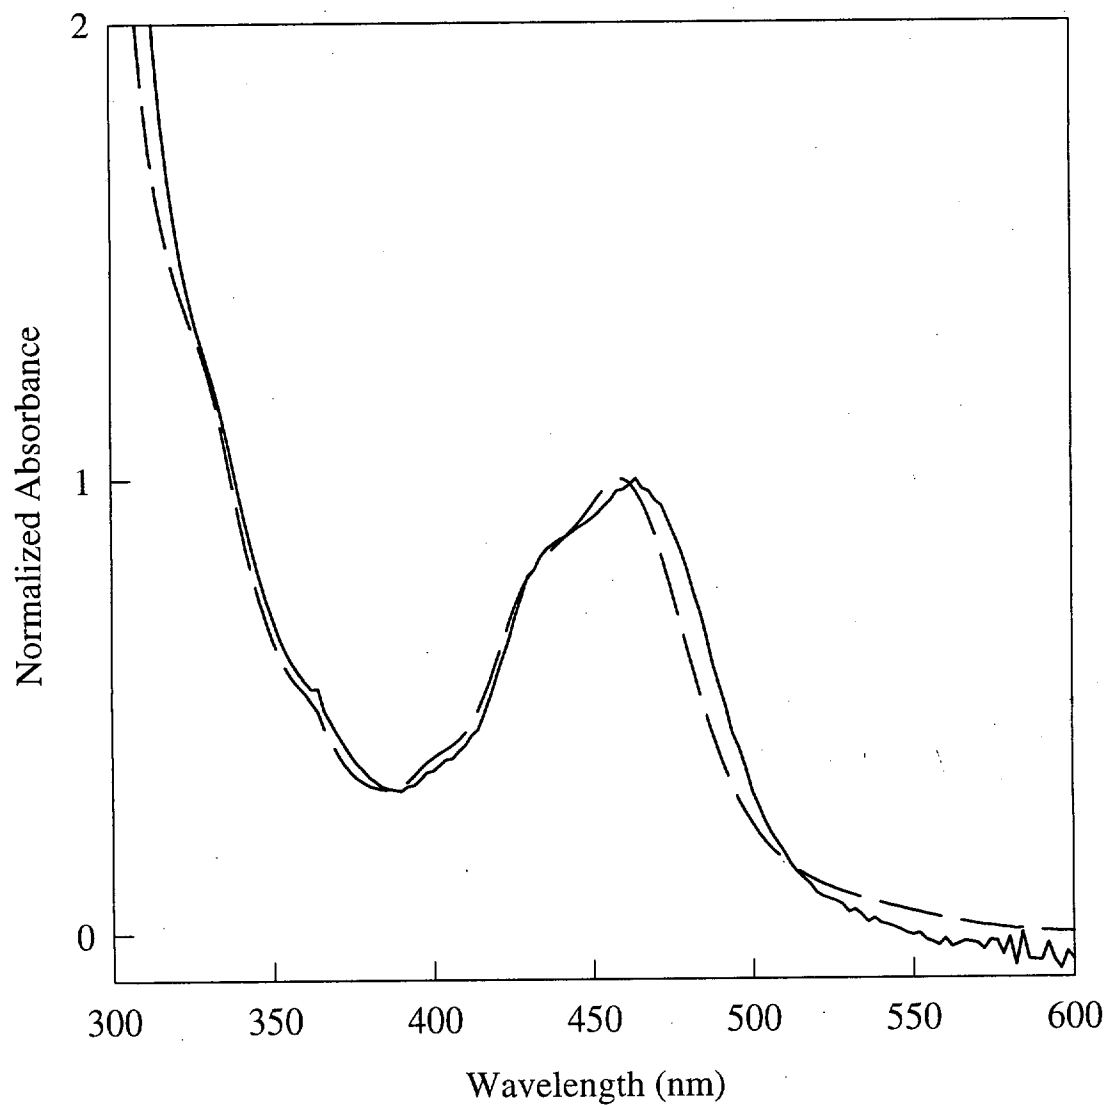

Supplement: Supplementary file 1 [file 5714547]
